# Supplementary material
Source: MDPI journal article supplement (https://www.mdpi.com/2220-9964/12/7/290)
Supplement: s1 [file s1]

Archive with 1 entries (1 files):
- ijgi-2396714-supplementary.pdf
